# Supplementary material for: Photoluminescence and Photocatalytic Properties of MWNTs Decorated with Fe-Doped ZnO Nanoparticles
Source: MDPI journal article supplement (doi:10.3390/ma16072858), 2023-04-03
Supplement: s1 [file s1]

## Photoluminescence and photocatalytic properties of MWCNT decorated with Fe doped ZnO nanoparticles

Adriana Popa <sup>1</sup>, Maria Stefan <sup>1</sup>, Sergiu Macavei <sup>1</sup>, Laura Elena Muresan <sup>2</sup>, Cristian Leostean <sup>1</sup>,  
Cornelia Veronica Floare-Avram <sup>1</sup>, Dana Toloman <sup>1,\*</sup>

<sup>1</sup> National Institute for Research and Development of Isotopic and Molecular Technologies, 67-103 Donat, 400293, Cluj-Napoca, Romania; adriana.popa@itim-cj.ro (A.P.); cristian.leostean@itim-cj.ro (C.L.)

<sup>2</sup> "Raluca Ripan" Institute for Research in Chemistry, "Babes-Bolyai" University, 30 Fântânele, 400294 Cluj-Napoca, Romania; laura.muresan@ubbcluj.ro

\* Correspondence: dana.toloman@itim-cj.ro

### 1. Influence of Fe doping degree on the photocatalytic performance of ZnO nanoparticles

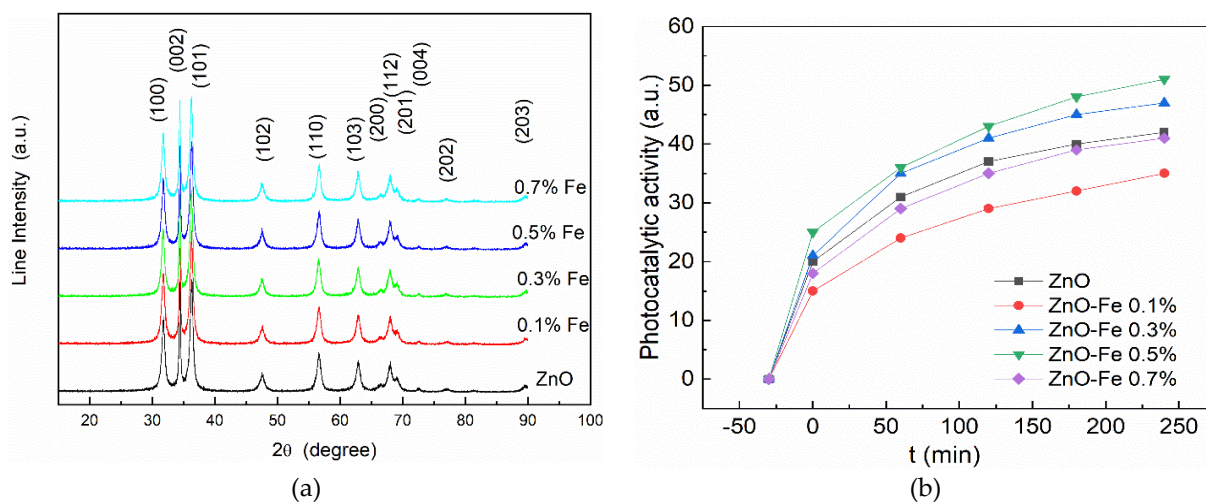

Figure S1 (a) XRD of  $\text{Zn}_{1-x}\text{Fe}_x\text{O}$  nanoparticles and (b) the photocatalytic activity of the samples

2. Size distribution of ZF0.5% nanoparticles evaluated by TEM

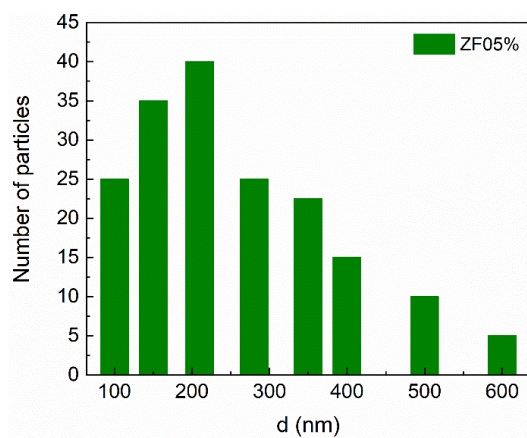

Figure S2. Size distribution of ZF0.5% nanoparticles estimated from TEM images

3. FT-IR spectra of CZF1-5 before and after photodegradation

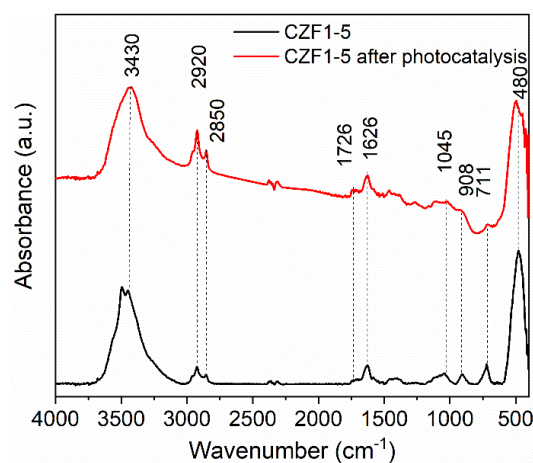

Figure S3. FT-IR spectra of CFZ1-5 before and after photodegradation

Table S1. FT-IR band assignment

| FT-IR bands (cm <sup>-1</sup> ) | Band assignment                     |
|---------------------------------|-------------------------------------|
| 3430                            | O-H                                 |
| 2920/ 2850                      | C-H stretching vibrations           |
| 1726                            | C = O                               |
| 1626                            | C = C                               |
| 1045                            | C-O stretching vibration            |
| 908                             | Zn-O-C bending vibration            |
| 711                             | hexagonal carbon in pristine MWCNTs |
| 480                             | Zn-O                                |

#### 4. HPLC-MS Characterization

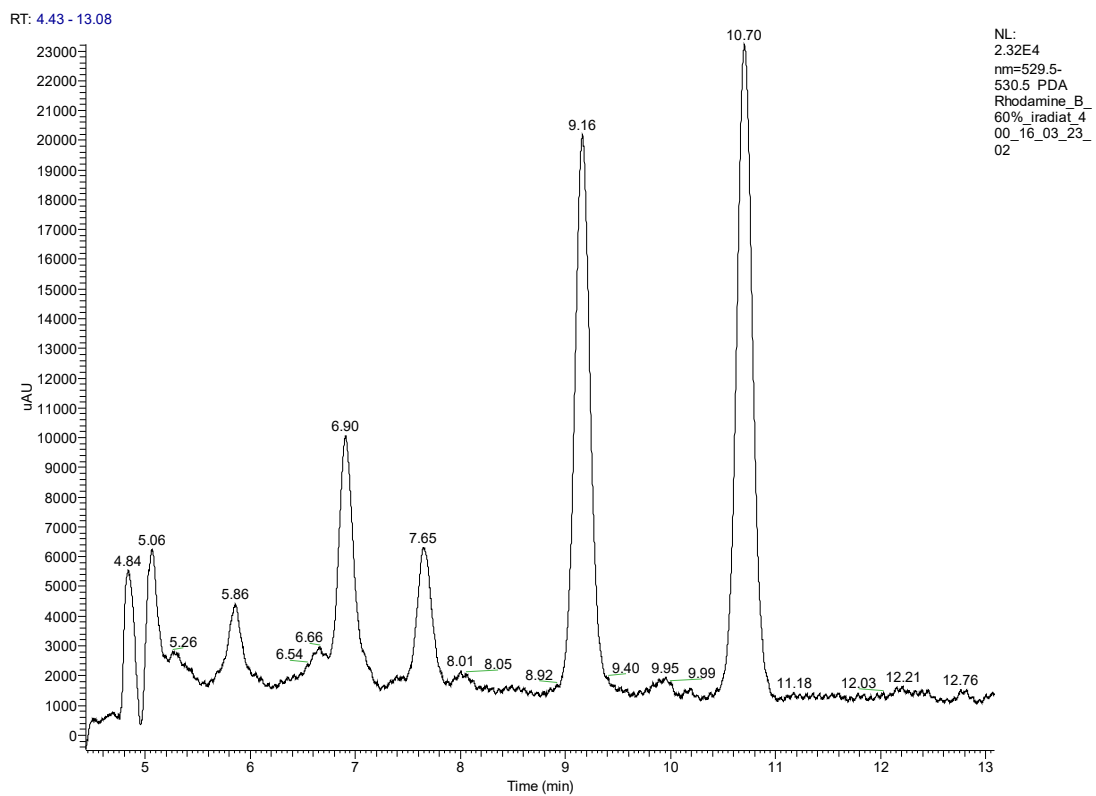

Figure S4. HPLC-MS Chromatogram of RhB solution in the presence of CZF1-5 sample after 150min UV light irradiation

### Mass spectrum for the retention time 5.06 min

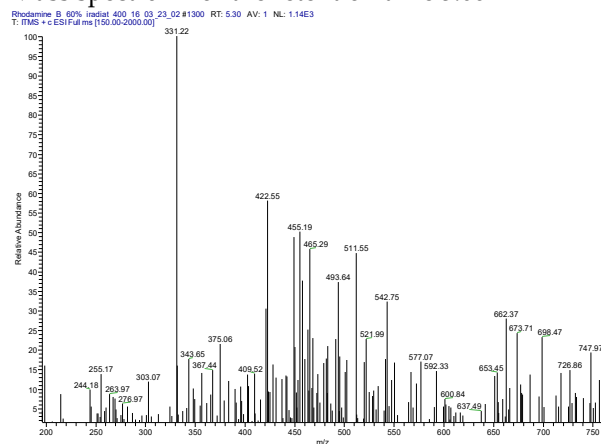

### Mass spectrum for the retention time 5.86 min

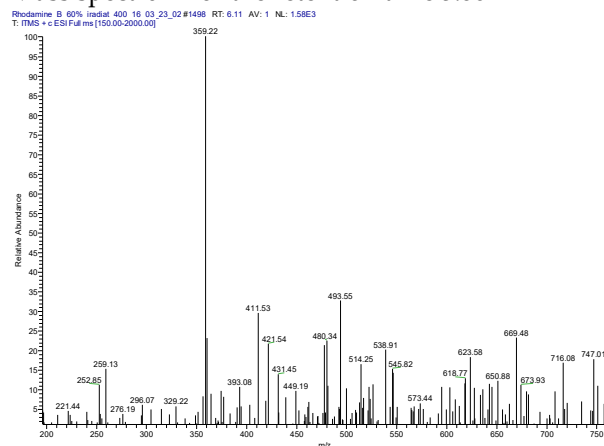

### Mass spectrum for the retention time 6.90 min

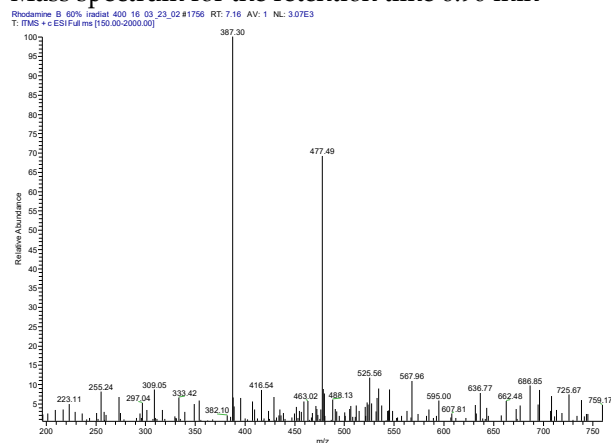

### Mass spectrum for the retention time 7.65 min

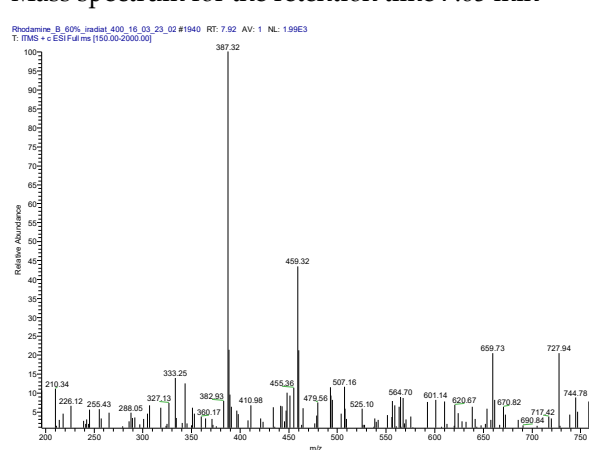

### Mass spectrum for the retention time 9.16 min

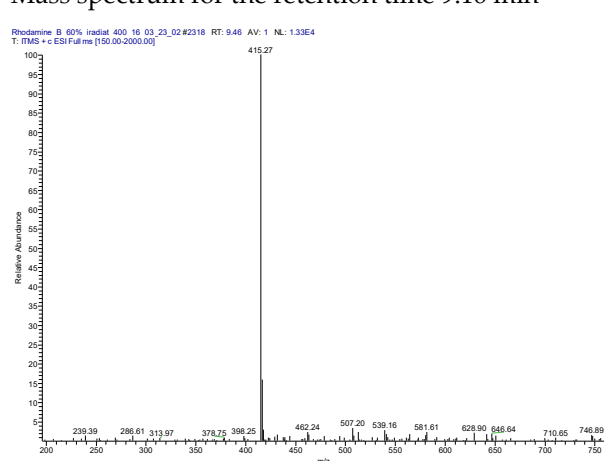

### Mass spectrum for the retention time 10.70 min

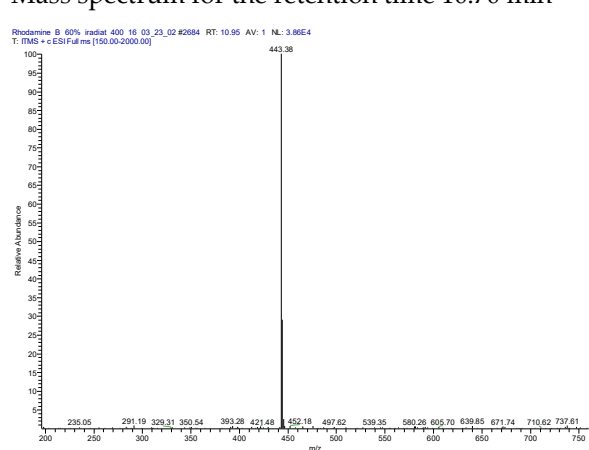

Figure S5. Mass spectrum for different retention times

## 5. Oxytetracycline photodegradation

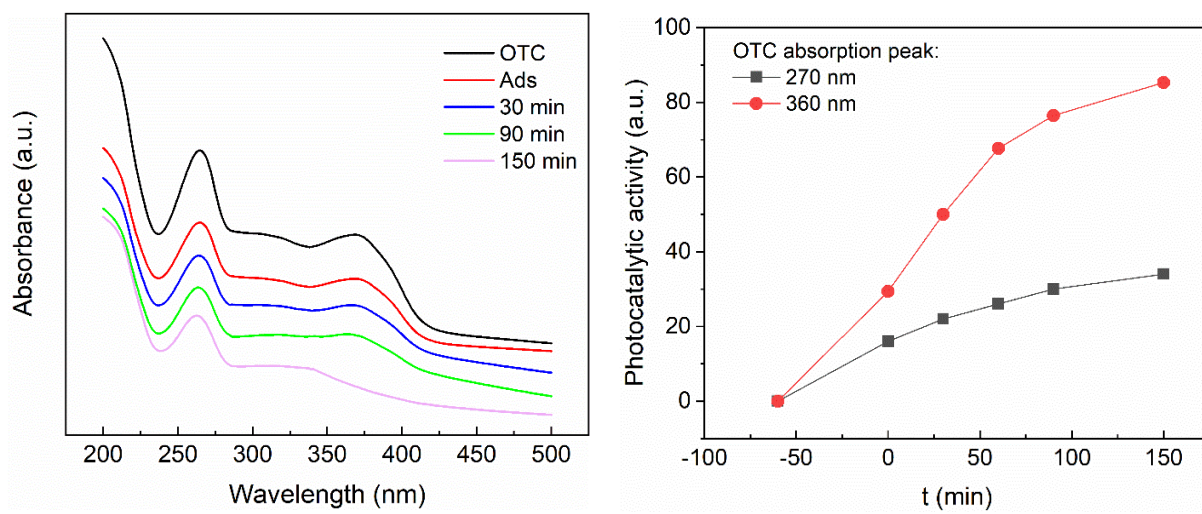

Figure S6 Photocatalytic degradation of Oxytetracycline in the presence of CZF1-5 nanocomposites
